# Supplementary material for: Ancient DNA from 8400 Year-Old Çatalhöyük Wheat: Implications for the Origin of Neolithic Agriculture
Source: PubMed Central journal article supplement (PMC4801371; doi:10.1371/journal.pone.0151974), 2016-03-21
Supplement: pone.0151974.s011.pdf [file pone.0151974.s011.pdf]

**S1 Table. Modern wheat samples included in the ancient wheat DNA analysis for comparison.**

| Accessions | Species               | Code for species | Genome | Origin                 | Codes for origin |
|------------|-----------------------|------------------|--------|------------------------|------------------|
| TUR03356   | <i>T. boeoticum</i>   | boe, Tb          | AA     | Diyarbakır, Karacadağ  | F                |
| TUR03363   | <i>T. boeoticum</i>   | boe, Tb          | AA     | Diyarbakır, Karacadağ  | F                |
| TUR03370   | <i>T. boeoticum</i>   | boe, Tb          | AA     | Diyarbakır, Karacadağ  | F                |
| TUR03383   | <i>T. boeoticum</i>   | boe, Tb          | AA     | Diyarbakır, Karacadağ  | F                |
| TR34980    | <i>T. boeoticum</i>   | boe, Tb          | AA     | Balıkesir              | A                |
| TR46999    | <i>T. boeoticum</i>   | boe, Tb          | AA     | Şanlıurfa              | E                |
| IG116190   | <i>T. urartu</i>      | ura, Tu          | AA     | Gaziantep              | D                |
| IG46113    | <i>T. urartu</i>      | ura, Tu          | AA     | Şanlıurfa              | E                |
| TUR02343   | <i>T. monococcum</i>  | mono, Tm         | AA     | Kastamonu              | B                |
| TR36938    | <i>T. monococcum</i>  | mono, Tm         | AA     | Balıkesir              | A                |
| IG45257    | <i>T. monococcum</i>  | mono, Tm         | AA     | Ağrı                   | I                |
| IG45033    | <i>T. dicoccum</i>    | dcum, Tdc        | AABB   | Hakkari                | H                |
| TUR02452   | <i>T. dicoccum</i>    | dcum, Tdm        | AABB   | Sinop                  | C                |
| IG44961    | <i>T. dicoccum</i>    | dcum, Tdm        | AABB   | Şanlıurfa              | E                |
| TUR03358   | <i>T. dicoccoides</i> | ddes, Tds        | AABB   | Diyarbakır, Karacadağ  | F                |
| TUR03362   | <i>T. dicoccoides</i> | ddes, Tds        | AABB   | Diyarbakır, Karacadağ  | F                |
| IG46253    | <i>T. dicoccoides</i> | ddes, Tds        | AABB   | Diyarbakır             | G                |
| IG46160    | <i>T. dicoccoides</i> | ddes, Tds        | AABB   | Şanlıurfa              | E                |
| TUR02628   | <i>T. dicoccoides</i> | ddes, Tds        | AABB   | Şanlıurfa, Ceylanpınar | E                |
| TUR02770   | <i>A. tauschii</i>    | tau, At          | DD     | Şanlıurfa, Ceylanpınar | E                |
| TUR02554   | <i>A. tauschii</i>    | tau, At          | DD     | Şanlıurfa, Ceylanpınar | E                |
| TUR03500   | <i>A. tauschii</i>    | tau, At          | DD     | Şanlıurfa, Ceylanpınar | E                |
| Çakmak79   | <i>T. durum</i>       | drm, Td          | AABB   | Cultivar               | -                |
| Çeşit1252  | <i>T. durum</i>       | drm, Td          | AABB   | Cultivar               | -                |
| Dağdaş94   | <i>T. aestivum</i>    | drm, Td          | AABBDD | Cultivar               | -                |
| Kıraç66    | <i>T. aestivum</i>    | drm, Td          | AABBDD | Cultivar               | -                |

Species name and locations were coded to be used in construction of genetic relationship trees.
