# Supplementary material for: Ancient DNA from 8400 Year-Old Çatalhöyük Wheat: Implications for the Origin of Neolithic Agriculture
Source: PubMed Central journal article supplement (PMC4801371; doi:10.1371/journal.pone.0151974), 2016-03-21
Supplement: pone.0151974.s012.pdf [file pone.0151974.s012.pdf]

**S2 Table. Effect of amount of the starting material in ancient DNA amplifications in relation to the state of preservation and the extraction method.**

| <b>Sample</b>  | <b>Quality</b> | <b>Starting mat.</b> | <b>DNA extraction method</b>                                 | <b>PCR</b> |
|----------------|----------------|----------------------|--------------------------------------------------------------|------------|
| Çatalhöyük62   | UWP            | 0.5 g                | CTAB (EtOH ppt & electroelution)                             | -          |
| Çatalhöyük61   | UWP            | 0.5 g                | CTAB (EtOH ppt & electroelution)                             | -          |
| Çatalhöyük62   | UWP            | 1.5 g                | CTAB (EtOH ppt & electroelution)                             | +          |
| Çatalhöyük61   | UWP            | 1.5 g                | CTAB (EtOH ppt & electroelution)                             | +          |
| Çatalhöyük61   | UWP            | 0.5 g                | CTAB (EtOH ppt only)                                         | +          |
| Çatalhöyük62   | UWP            | 1.0 g                | CTAB (No EtOH ppt or electroelution but column purification) | -          |
| Çatalhöyük61   | UWP            | 1.0 g                | CTAB (No EtOH ppt or electroelution but column purification) | -          |
| Çatalhöyük62   | UWP            | 1.0 g                | CTAB (No EtOH ppt or electroelution but Qiagen purification) | -          |
| Çatalhöyük61   | UWP            | 1.0 g                | CTAB (No EtOH ppt or electroelution but Qiagen purification) | -          |
| Çatalhöyük61   | UWP            | 20 seeds             | CTAB (No EtOH ppt or electroelution but column purification) | -          |
| Çatalhöyük62   | UWP            | 15 seeds             | Direct extraction                                            | -          |
| Çatalhöyük61   | UWP            | 15 seeds             | Direct extraction                                            | -          |
| Çatalhöyük61   | UWP            | Single seed          | Single seed extraction                                       | -          |
| Çatalhöyük62   | UWP            | Single seed          | Single seed extraction                                       | -          |
| İmamoğlu H.    | WP             | 0.5 g                | CTAB (EtOH ppt & electroelution)                             | +          |
| İmamoğlu H.    | WP             | 1.5g                 | CTAB (EtOH ppt only)                                         | +          |
| İmamoğlu H.    | WP             | 0.5 g                | CTAB (EtOH ppt only)                                         | +          |
| İmamoğlu H.    | WP             | Single seed          | Single seed extraction                                       | +          |
| İmamoğlu H.    | WP             | 20 seeds             | CTAB (No EtOH ppt or electroelution but column purification) | -          |
| İmamoğlu H.    | WP             | Single seed          | Column extraction                                            | -          |
| Patnos (emmer) | WP/b           | 0.5 g                | CTAB (EtOH ppt & electroelution)                             | +          |
| Patnos (emmer) | WP/b           | 1.5 g                | CTAB (EtOH ppt only)                                         | +          |
| Patnos (naked) | WP/g           | 0.5 g                | CTAB (EtOH ppt & electroelution)                             | -          |
| Patnos (naked) | WP/g           | 20 seeds             | CTAB (No EtOH ppt or electroelution but column purification) | -          |
| Patnos (emmer) | P/b            | 0.5 g                | CTAB (EtOH ppt & electroelution)                             | -          |

UWP: Unusually well preserved; WP: Well preserved; WP/b: Well preserved/black; WP/g: Well preserved/grey; P/b: Powder black
