# Supplementary material for: Ancient DNA from 8400 Year-Old Çatalhöyük Wheat: Implications for the Origin of Neolithic Agriculture
Source: PubMed Central journal article supplement (PMC4801371; doi:10.1371/journal.pone.0151974), 2016-03-21
Supplement: pone.0151974.s013.pdf [file pone.0151974.s013.pdf]

**S3 Table. Total amplified loci and number of sequences obtained in the study**

| Sample                  | Amplified Loci            | Number of Sequences Obtained |         |         |
|-------------------------|---------------------------|------------------------------|---------|---------|
|                         |                           | ~250 bp                      | ~150 bp | ~100 bp |
| Çatalhöyük              | ~150 bp, ~100 bp          | -                            | 22      | 10      |
| İmamoğlu Höyük          | ~250 bp, ~150 bp, ~100 bp | 3                            | 2       | 11      |
| Patnos                  | ~250 bp, ~150 bp          | -                            | -       | -       |
| 26 modern wheat samples | ~250 bp, ~150 bp          | 29                           | 19      | -       |
